# Supplementary material for: Analyzing Temporal Trends of Urban Evaporation Using Generalized Additive Models
Source: MDPI journal article supplement (doi:10.3390/land11040508), 2022-03-31
Supplement: s1 [file s1]

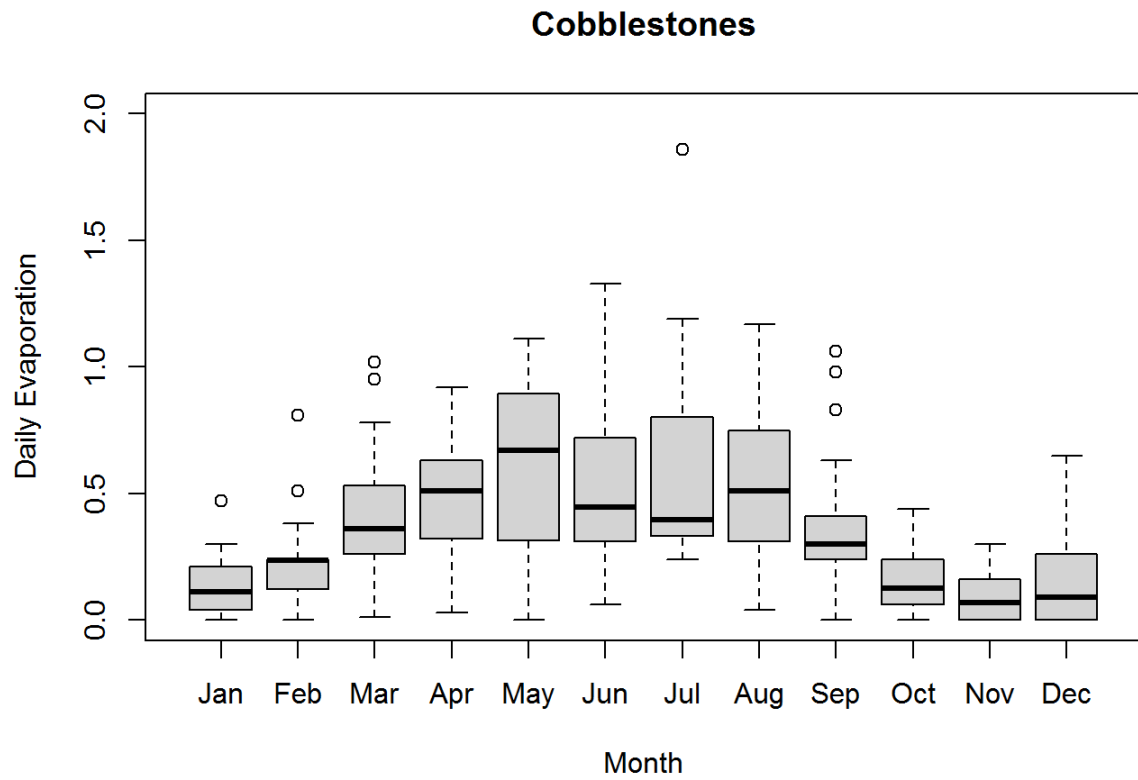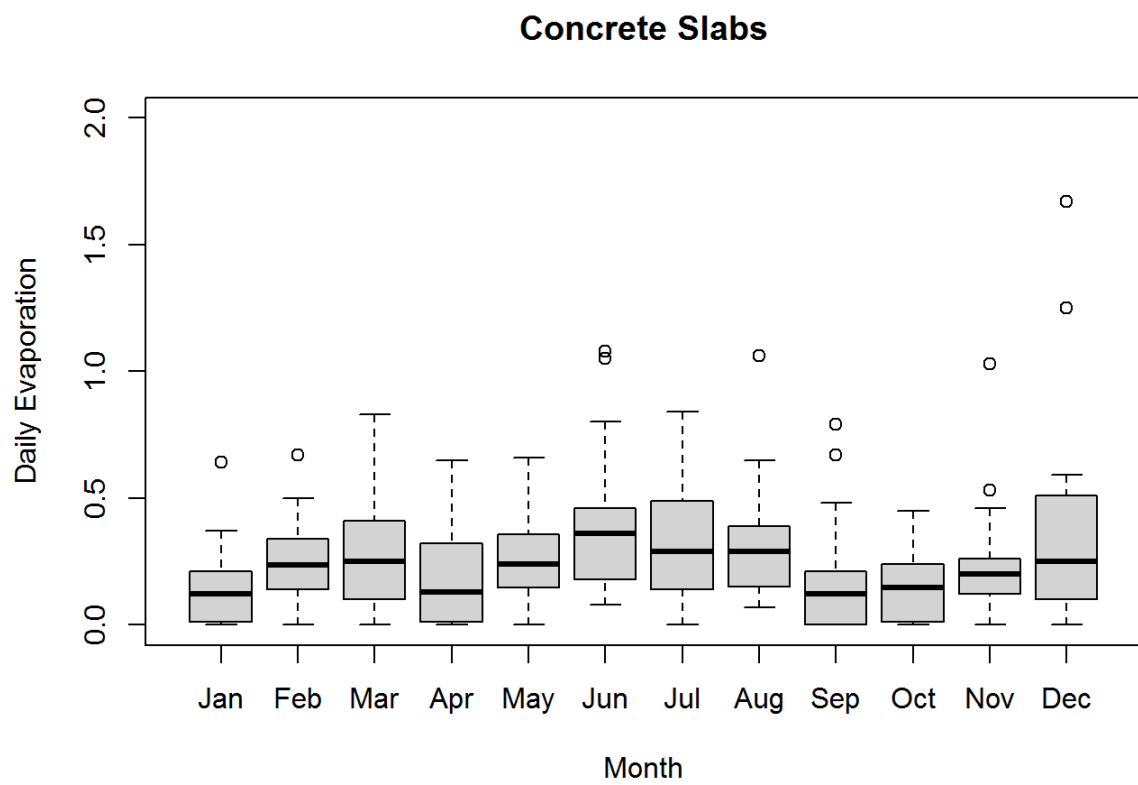

Figure S1. Daily evaporation by month for cobble stones and concrete slabs.

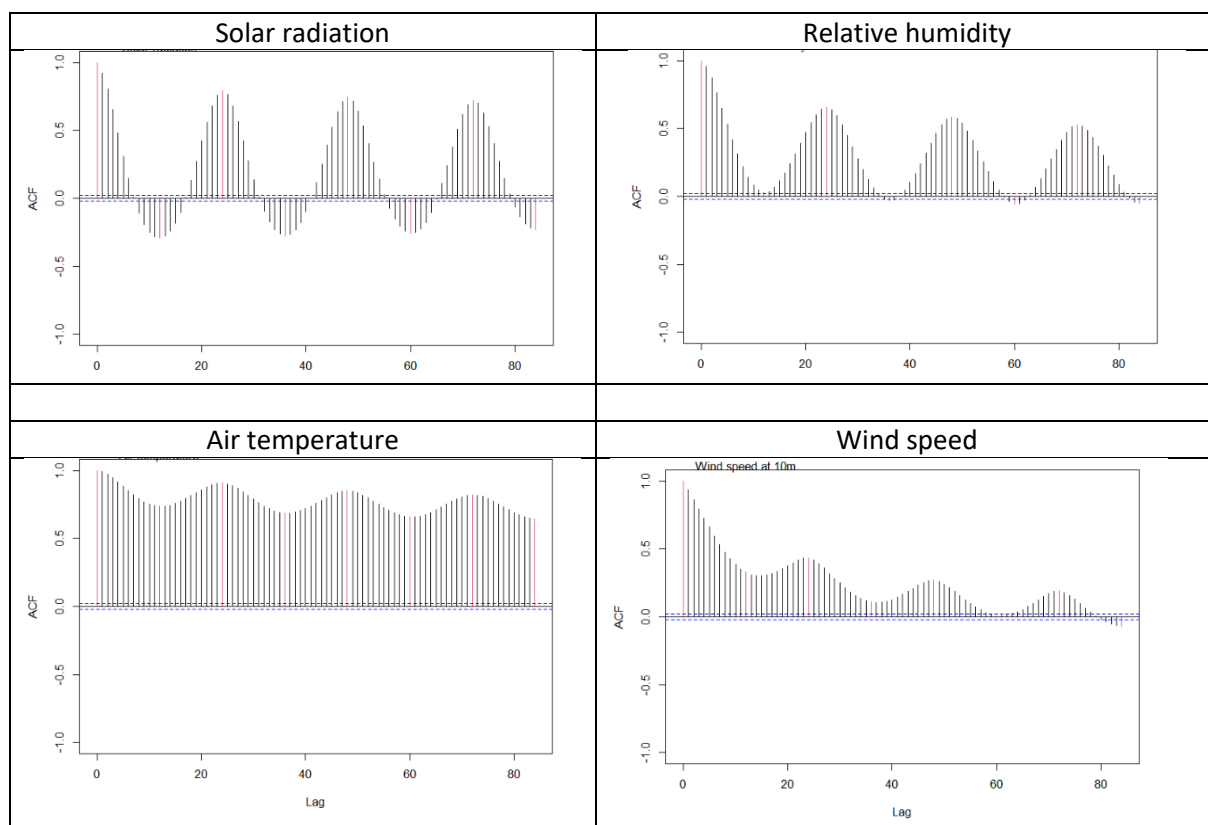

Figure S2. Autocorrelation function (ACF) for time series. (A) ACF for solar radiation, (B) ACF for Relative humidity, (C) ACF for temperature, (D) ACF for wind speed. The dotted line is  $2\times$  standard errors.

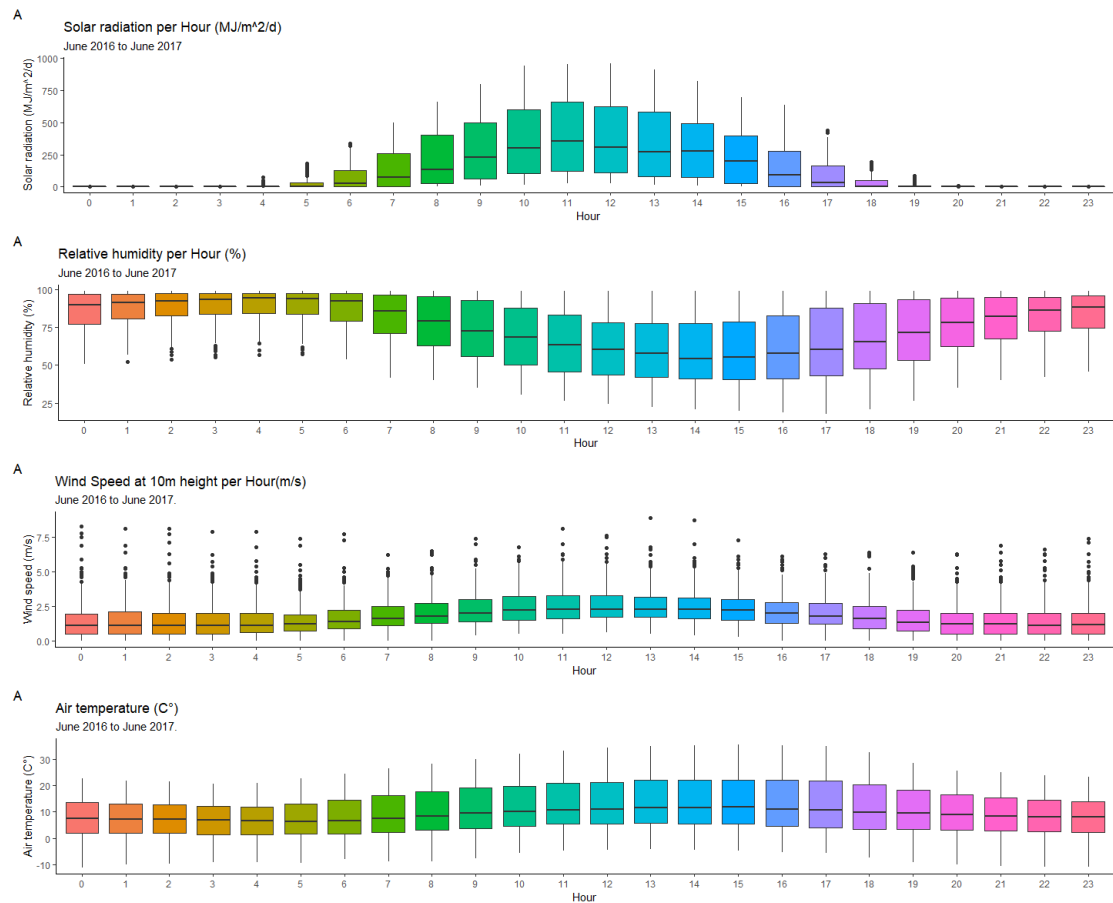

Figure S3. Hourly box plot of meteorological variables as measured June 2016 to June 2017 in Berlin.
